# Supplementary material for: Metatranscriptomic analysis of the microbiota of tumor tissue in colon cancer
Source: Research Square preprint supplement (doi:10.21203/rs.3.rs-6213767/v1), 2025-04-14
Supplement: Supplementary file 2 [file 838f1cc74967a8ff99fffa1c.xlsx]

## Sheet: TableS1
Table S1. Evaluation of potential selection bias.
		Selected n (%)	Non-selected n (%)	P-value
Physical characteristics
Sex	Male	14 (78)	19 (65)	0.5
	Female	4 (22)	10 (35)
Age	Average	66.72	68	0.63
Clinical parameters
Tumor localization	Right	12 (67)	13 (45)	0.23
	Left	6 (33)	16 (55)
Tumor size	T1	2 (11)	4 (14)	1
	T2	2 (11)	4 (14)
	T3	14 (78)	20 (69)
	T4	0 (0)	1 (3)
Spread to lymph nodes	N0	9 (50)	20 (69)	0.23
	N>0	9 (50)	9 (31)
Metastasis	M0	17 (94)	27 (93)	1
	M>0	1 (6)	2 (7)

## Sheet: TableS2
Table S2. Clinical parameters of patients included.
Paired gut samples (Control & Tumor tissue)
Patient	Sex	Age	Tumor location	TNM
CCR104	male	70	left-colon	pT3N2
CCR115	male	46	right-colon	pT3N0
CCR116	male	74	right-colon	pT3N1
CCR117	male	67	right-colon	pT1N0
CCR121	male	78	rectum	pT3N3
CCR125	male	81	right-colon	pT3N0
CCR126	male	66	cecum	pT3N1b
CCR128	male	67	cecum	pT3N0
CCR129	male	79	rectum	pT1N0
CCR130	female	73	right-colon	pT3N1c
CCR137	male	62	cecum	pT3N1M1
CCR142	male	61	right-colon	pT3N0
CCR146	female	65	right-colon	pT3N1
CCR147	male	58	splenic-flexure	pT3N1
CCR152	female	58	left-colon	pT2N0
CCR156	male	60	left-colon	pT3N2
CCR158	female	80	right-colon	pT3N0
CCR160	male	56	right-colon	pT2N0
Subgingival samples (G)
Patient	Sex	Age	Periodontal disease		BOP	Tooth loss
CCR104	male	70	IIA		0.7	2
CCR115	male	46	Nd		0.2	1
CCR116	male	74	IB		1	11
CCR117	male	67	IIB		1.5	9
CCR126	male	66	0		0.5	1
CCR130	female	73	IIIB		1.2	9
CCR142	male	61	IVB		2	27
CCR114	male	67	IIA		0.5	6
CCR133	female	59	IA		0.4	1
CCR135	male	57	IIA		1.8	3
CCR138	male	59	-		-	28
CCR143	male	60	Nd		0.3	0
CCR153	female	53	Nd		0.4	11
CCR154	male	75	IIIA		1.1	4
CCR155	male	64	IIA		0.8	2
TNM: Tumor staging system stands for Tumor size, lymphatic Nodes affected, and presence of Metastasis
Nd: non-detected
BOP: Bleeding on probing

## Sheet: TableS3
Table S3. Clinical differences between patients by enterotype.
		Type 1 n (%)	Type 2 n (%)	P-value
Physical characteristics
Sex	Male	8 (100)	6 (60)	0.09
	Famale	0 (0)	4 (40)
Age	Average	65.75	67.5	0.85
Clinical parameters
Tumor localization	Right	5 (63)	7 (70)	0.99
	Left	3 (37)	3 (30)
Tumor size	T1	1 (12)	1 (10)	0.99
	T2	1 (12)	1 (10)
	T3	6 (75)	8 (80)
Spread to lymph nodes	N0	4 (50)	5 (50)	1
	N>0	4 (50)	5 (50)
Metastasis	M0	7 (87)	10 (100)	0.44
	M>0	1 (12)	0 (0)

## Sheet: TableS4
Table S4. Differential genes tumor-control tissue
KEGG	p.value.notShrinked	log2FCdeseq.notShrinked	KEGG_DESCRIPTION	KEGG_PATHWAYS_DESCRIPTION
K03399	0.025304	-1.6892	cbiE; cobalt-precorrin-7 (C5)-methyltransferase [EC:2,1,1,289]	Porphyrin and chlorophyll metabolism [PATH:ko00860]
K07006	0.034731	-1.59082	K07006; uncharacterized protein	Function unknown
K13019	0.0485272	-1.57555	wbpI, wlbD; UDP-GlcNAc3NAcA epimerase [EC:5,1,3,23]	Amino sugar and nucleotide sugar metabolism [PATH:ko00520]|Lipopolysaccharide biosynthesis proteins [BR:ko01005]
K02568	0.0440806	-1.42078	napB; cytochrome c-type protein NapB	Nitrogen metabolism [PATH:ko00910]
K01482	0.026215	-1.41875	DDAH, ddaH; dimethylargininase [EC:3,5,3,18]	Exosome [BR:ko04147]
K12516	0.0147582	-1.41045	bigA; putative surface-exposed virulence protein	Transporters [BR:ko02000]|Secretion system [BR:ko02044]
K15125	0.00911155	-1.34802	fhaB; filamentous hemagglutinin	Pertussis [PATH:ko05133]|Glycosaminoglycan binding proteins [BR:ko00536]
K04756	0.0235588	-1.30056	ahpD; alkyl hydroperoxide reductase subunit D	General function prediction only
K18815	0.0470353	-1.21174	aac6-I; aminoglycoside 6'-N-acetyltransferase I [EC:2,3,1,82]	Antimicrobial resistance genes [BR:ko01504]
K03606	0.030789	-1.13516	wcaJ; putative colanic acid biosysnthesis UDP-glucose lipid carrier transferase	Biofilm formation - Vibrio cholerae [PATH:ko05111]
K11616	0.0246656	-1.10663	maeN; malate:Na+ symporter	Two-component system [PATH:ko02020]
K15587	0.0439765	-1.08332	nikD; nickel transport system ATP-binding protein [EC:3,6,3,24]	ABC transporters [PATH:ko02010]|Transporters [BR:ko02000]
K07326	0.0479841	-1.05582	fhaC; hemolysin activation/secretion protein	Pertussis [PATH:ko05133]
K18430	0.00507073	-1.00703	legI, neuB2; N,N'-diacetyllegionaminate synthase [EC:2,5,1,101]	Amino sugar and nucleotide sugar metabolism [PATH:ko00520]
K06143	0.0273404	-0.978699	creD; inner membrane protein	Structural proteins
K09949	0.0332031	-0.830863	K09949; uncharacterized protein	Function unknown
K02031	0.0308696	-0.787926	ABC,PE,A; peptide/nickel transport system ATP-binding protein	Quorum sensing [PATH:ko02024]|Transporters [BR:ko02000]
K02408	0.0309834	-0.767265	fliE; flagellar hook-basal body complex protein FliE	Flagellar assembly [PATH:ko02040]|Bacterial motility proteins [BR:ko02035]
K02418	0.0369717	-0.765412	fliOZ, fliO; flagellar protein FliO/FliZ	Flagellar assembly [PATH:ko02040]|Secretion system [BR:ko02044]|Bacterial motility proteins [BR:ko02035]
K10857	0.0458792	-0.716773	exoX; exodeoxyribonuclease X [EC:3,1,11,-]	Mismatch repair [PATH:ko03430]|DNA repair and recombination proteins [BR:ko03400]
K01879	0.0179848	-0.653844	glyS; glycyl-tRNA synthetase beta chain [EC:6,1,1,14]	Aminoacyl-tRNA biosynthesis [PATH:ko00970]|Amino acid related enzymes [BR:ko01007]|Transfer RNA biogenesis [BR:ko03016]
K00342	0.0111626	-0.648374	nuoM; NADH-quinone oxidoreductase subunit M [EC:7,1,1,2]	Oxidative phosphorylation [PATH:ko00190]
K15876	0.0363869	-0.644198	nrfH; cytochrome c nitrite reductase small subunit	Nitrogen metabolism [PATH:ko00910]
K18231	0.0392719	-0.561121	msrA, vmlR; macrolide transport system ATP-binding/permease protein	ABC transporters [PATH:ko02010]|Transporters [BR:ko02000]|Antimicrobial resistance genes [BR:ko01504]
K07037	0.0301764	-0.52821	pgpH; cyclic-di-AMP phosphodiesterase PgpH [EC:3,1,4,-]	Enzymes with EC numbers
K02419	0.0471543	-0.509371	fliP; flagellar biosynthetic protein FliP	Flagellar assembly [PATH:ko02040]|Secretion system [BR:ko02044]|Bacterial motility proteins [BR:ko02035]
K03803	0.0170971	-0.501833	rseC; sigma-E factor negative regulatory protein RseC	Transcription machinery [BR:ko03021]
K13924	0.0261669	-0.476776	cheBR; two-component system, chemotaxis family, CheB/CheR fusion protein [EC:2,1,1,80 3,1,1,61]	Two-component system [PATH:ko02020]|Bacterial chemotaxis [PATH:ko02030]|Two-component system [BR:ko02022]|Bacterial motility proteins [BR:ko02035]
K16090	0.00764418	-0.475375	fiu; catecholate siderophore receptor	Transporters [BR:ko02000]
K11626	0.00265473	-0.470235	glnT; putative sodium/glutamine symporter	Two-component system [PATH:ko02020]
K02549	0.0407309	-0.467504	menC; O-succinylbenzoate synthase [EC:4,2,1,113]	Ubiquinone and other terpenoid-quinone biosynthesis [PATH:ko00130]
K01644	0.0466459	-0.448562	citE; citrate lyase subunit beta / citryl-CoA lyase [EC:4,1,3,34]	Two-component system [PATH:ko02020]
K02536	0.00209586	-0.437708	lpxD; UDP-3-O-[3-hydroxymyristoyl] glucosamine N-acyltransferase [EC:2,3,1,191]	Lipopolysaccharide biosynthesis [PATH:ko00540]|Lipopolysaccharide biosynthesis proteins [BR:ko01005]
K11719	0.0136916	-0.427269	lptC; lipopolysaccharide export system protein LptC	Transporters [BR:ko02000]
K02849	0.0405005	-0.418732	waaQ, rfaQ; heptosyltransferase III [EC:2,4,-,-]	Lipopolysaccharide biosynthesis [PATH:ko00540]|Glycosyltransferases [BR:ko01003]|Lipopolysaccharide biosynthesis proteins [BR:ko01005]
K00818	0.0333205	-0.413988	E2,6,1,11, argD; acetylornithine aminotransferase [EC:2,6,1,11]	Arginine biosynthesis [PATH:ko00220]|Amino acid related enzymes [BR:ko01007]
K02517	0.000557213	-0.398745	lpxL, htrB; Kdo2-lipid IVA lauroyltransferase [EC:2,3,1,241]	Lipopolysaccharide biosynthesis [PATH:ko00540]|Lipopolysaccharide biosynthesis proteins [BR:ko01005]
K13010	0.00618819	-0.384889	per, rfbE; perosamine synthetase [EC:2,6,1,102]	Amino sugar and nucleotide sugar metabolism [PATH:ko00520]|Lipopolysaccharide biosynthesis proteins [BR:ko01005]|Amino acid related enzymes [BR:ko01007]
K09760	0.0361319	-0.383531	rmuC; DNA recombination protein RmuC	Replication and repair
K01154	0.0373895	-0.374235	hsdS; type I restriction enzyme, S subunit [EC:3,1,21,3]	Prokaryotic defense system [BR:ko02048]
K00347	0.0299919	-0.373339	nqrB; Na+-transporting NADH:ubiquinone oxidoreductase subunit B [EC:7,2,1,1]	Enzymes with EC numbers
K06861	0.0133652	-0.37005	lptB; lipopolysaccharide export system ATP-binding protein [EC:3,6,3,-]	ABC transporters [PATH:ko02010]|Transporters [BR:ko02000]
K02548	0.0485363	-0.369323	menA; 1,4-dihydroxy-2-naphthoate octaprenyltransferase [EC:2,5,1,74 2,5,1,-]	Ubiquinone and other terpenoid-quinone biosynthesis [PATH:ko00130]|Prenyltransferases [BR:ko01006]
K00950	0.0311426	-0.355446	folK; 2-amino-4-hydroxy-6-hydroxymethyldihydropteridine diphosphokinase [EC:2,7,6,3]	Folate biosynthesis [PATH:ko00790]
K03856	0.0182042	-0.342527	AROA2, aroA; 3-deoxy-7-phosphoheptulonate synthase [EC:2,5,1,54]	Phenylalanine, tyrosine and tryptophan biosynthesis [PATH:ko00400]
K07462	0.0337251	-0.340856	recJ; single-stranded-DNA-specific exonuclease [EC:3,1,-,-]	Base excision repair [PATH:ko03410]|Mismatch repair [PATH:ko03430]|Homologous recombination [PATH:ko03440]|DNA repair and recombination proteins [BR:ko03400]
K03787	0.0433534	-0.333874	surE; 5'-nucleotidase [EC:3,1,3,5]	Purine metabolism [PATH:ko00230]|Pyrimidine metabolism [PATH:ko00240]|Nicotinate and nicotinamide metabolism [PATH:ko00760]
K18353	0.0350797	-0.325528	vanJ; vancomycin resistance protein VanJ	Two-component system [PATH:ko02020]|Vancomycin resistance [PATH:ko01502]|Antimicrobial resistance genes [BR:ko01504]
K02622	0.0193073	-0.322488	parE; topoisomerase IV subunit B [EC:5,99,1,-]	DNA replication proteins [BR:ko03032]|Chromosome and associated proteins [BR:ko03036]|Prokaryotic defense system [BR:ko02048]
K00348	0.0418749	-0.317369	nqrC; Na+-transporting NADH:ubiquinone oxidoreductase subunit C [EC:7,2,1,1]	Enzymes with EC numbers
K02968	0.000568907	-0.301431	RP-S20, rpsT; small subunit ribosomal protein S20	Ribosome [PATH:ko03010]|Ribosome [BR:ko03011]
K09808	0.0110237	-0.299342	lolC_E; lipoprotein-releasing system permease protein	ABC transporters [PATH:ko02010]|Transporters [BR:ko02000]
K02523	0.0290049	-0.295206	ispB; octaprenyl-diphosphate synthase [EC:2,5,1,90]	Terpenoid backbone biosynthesis [PATH:ko00900]|Prenyltransferases [BR:ko01006]
K04096	0.0473787	-0.293481	smf; DNA processing protein	Replication and repair|Unclassified viral proteins
K03773	0.0334464	-0.290378	fklB; FKBP-type peptidyl-prolyl cis-trans isomerase FklB [EC:5,2,1,8]	Chaperones and folding catalysts [BR:ko03110]
K09117	0.00458492	-0.283525	K09117; uncharacterized protein	Function unknown
K02913	0.000340016	-0.268249	RP-L33, MRPL33, rpmG; large subunit ribosomal protein L33	Ribosome [PATH:ko03010]|Ribosome [BR:ko03011]
K07164	0.028085	-0.267144	K07164; uncharacterized protein	Function unknown
K02935	0.00683596	-0.264927	RP-L7, MRPL12, rplL; large subunit ribosomal protein L7/L12	Ribosome [PATH:ko03010]|Ribosome [BR:ko03011]
K04762	0.0157449	-0.262495	hslR; ribosome-associated heat shock protein Hsp15	Chaperones and folding catalysts [BR:ko03110]
K03612	0.0498784	-0.261765	rnfG; Na+-translocating ferredoxin:NAD+ oxidoreductase subunit G	Energy metabolism
K01775	0.00220609	-0.260168	alr; alanine racemase [EC:5,1,1,1]	D-Alanine metabolism [PATH:ko00473]|Vancomycin resistance [PATH:ko01502]|Peptidoglycan biosynthesis and degradation proteins [BR:ko01011]
K02939	0.0116481	-0.259529	RP-L9, MRPL9, rplI; large subunit ribosomal protein L9	Ribosome [PATH:ko03010]|Ribosome [BR:ko03011]
K02884	0.00189097	-0.258442	RP-L19, MRPL19, rplS; large subunit ribosomal protein L19	Ribosome [PATH:ko03010]|Ribosome [BR:ko03011]
K00812	0.0330682	-0.24821	aspB; aspartate aminotransferase [EC:2,6,1,1]	Alanine, aspartate and glutamate metabolism [PATH:ko00250]|Cysteine and methionine metabolism [PATH:ko00270]|Arginine biosynthesis [PATH:ko00220]|Arginine and proline metabolism [PATH:ko00330]|Tyrosine metabolism [PATH:ko00350]|Phenylalanine metabolism [PATH:ko00360]|Phenylalanine, tyrosine and tryptophan biosynthesis [PATH:ko00400]|Isoquinoline alkaloid biosynthesis [PATH:ko00950]|Tropane, piper…
K03168	0.00382863	-0.246634	topA; DNA topoisomerase I [EC:5,99,1,2]	DNA replication proteins [BR:ko03032]|DNA repair and recombination proteins [BR:ko03400]
K03704	0.00467277	-0.244569	cspA; cold shock protein (beta-ribbon, CspA family)	Transcription factors [BR:ko03000]
K02956	0.0029606	-0.244548	RP-S15, MRPS15, rpsO; small subunit ribosomal protein S15	Ribosome [PATH:ko03010]|Ribosome [BR:ko03011]
K03769	0.0392934	-0.242812	ppiC; peptidyl-prolyl cis-trans isomerase C [EC:5,2,1,8]	Chaperones and folding catalysts [BR:ko03110]
K00075	0.00276358	-0.242789	murB; UDP-N-acetylmuramate dehydrogenase [EC:1,3,1,98]	Amino sugar and nucleotide sugar metabolism [PATH:ko00520]|Peptidoglycan biosynthesis [PATH:ko00550]|Peptidoglycan biosynthesis and degradation proteins [BR:ko01011]
K02864	0.00663264	-0.242051	RP-L10, MRPL10, rplJ; large subunit ribosomal protein L10	Ribosome [PATH:ko03010]|Ribosome [BR:ko03011]
K08307	0.045227	-0.237104	mltD, dniR; membrane-bound lytic murein transglycosylase D [EC:4,2,2,-]	Peptidoglycan biosynthesis and degradation proteins [BR:ko01011]
K01840	0.0340296	-0.230739	manB; phosphomannomutase [EC:5,4,2,8]	Fructose and mannose metabolism [PATH:ko00051]|Amino sugar and nucleotide sugar metabolism [PATH:ko00520]
K02520	0.00195617	-0.222586	infC, MTIF3; translation initiation factor IF-3	Translation factors [BR:ko03012]|Mitochondrial biogenesis [BR:ko03029]
K00991	0.0268959	-0.221862	ispD; 2-C-methyl-D-erythritol 4-phosphate cytidylyltransferase [EC:2,7,7,60]	Terpenoid backbone biosynthesis [PATH:ko00900]
K00012	0.0462045	-0.220446	UGDH, ugd; UDPglucose 6-dehydrogenase [EC:1,1,1,22]	Pentose and glucuronate interconversions [PATH:ko00040]|Ascorbate and aldarate metabolism [PATH:ko00053]|Amino sugar and nucleotide sugar metabolism [PATH:ko00520]
K01890	0.012564	-0.217857	FARSB, pheT; phenylalanyl-tRNA synthetase beta chain [EC:6,1,1,20]	Aminoacyl-tRNA biosynthesis [PATH:ko00970]|Amino acid related enzymes [BR:ko01007]|Transfer RNA biogenesis [BR:ko03016]
K02959	0.00330592	-0.217315	RP-S16, MRPS16, rpsP; small subunit ribosomal protein S16	Ribosome [PATH:ko03010]|Ribosome [BR:ko03011]|Mitochondrial biogenesis [BR:ko03029]
K06207	0.0401189	-0.214367	typA, bipA; GTP-binding protein	Signaling proteins
K02982	0.00956686	-0.205169	RP-S3, rpsC; small subunit ribosomal protein S3	Ribosome [PATH:ko03010]|Ribosome [BR:ko03011]
K02621	0.0342572	-0.202529	parC; topoisomerase IV subunit A [EC:5,99,1,-]	DNA replication proteins [BR:ko03032]|Chromosome and associated proteins [BR:ko03036]|Prokaryotic defense system [BR:ko02048]
K03076	0.0346064	-0.198609	secY; preprotein translocase subunit SecY	Protein export [PATH:ko03060]|Bacterial secretion system [PATH:ko03070]|Quorum sensing [PATH:ko02024]|Secretion system [BR:ko02044]
K02835	0.0128744	-0.196178	prfA, MTRF1, MRF1; peptide chain release factor 1	Translation factors [BR:ko03012]
K02888	0.0168147	-0.196145	RP-L21, MRPL21, rplU; large subunit ribosomal protein L21	Ribosome [PATH:ko03010]|Ribosome [BR:ko03011]
K02897	0.048834	-0.192951	RP-L25, rplY; large subunit ribosomal protein L25	Ribosome [PATH:ko03010]|Ribosome [BR:ko03011]
K04744	0.0380642	-0.191859	lptD, imp, ostA; LPS-assembly protein	Transporters [BR:ko02000]
K02863	0.0164293	-0.187577	RP-L1, MRPL1, rplA; large subunit ribosomal protein L1	Ribosome [PATH:ko03010]|Ribosome [BR:ko03011]
K03654	0.0332554	-0.185408	recQ; ATP-dependent DNA helicase RecQ [EC:3,6,4,12]	RNA degradation [PATH:ko03018]|DNA repair and recombination proteins [BR:ko03400]
K01992	0.0385161	-0.184459	ABC-2,P; ABC-2 type transport system permease protein	Transporters [BR:ko02000]
K02988	0.0422986	-0.182847	RP-S5, MRPS5, rpsE; small subunit ribosomal protein S5	Ribosome [PATH:ko03010]|Ribosome [BR:ko03011]
K02886	0.0259479	-0.178584	RP-L2, MRPL2, rplB; large subunit ribosomal protein L2	Ribosome [PATH:ko03010]|Ribosome [BR:ko03011]
K08301	0.0416382	-0.174295	rng, cafA; ribonuclease G [EC:3,1,26,-]	Messenger RNA biogenesis [BR:ko03019]|Ribosome biogenesis [BR:ko03009]
K02963	0.0399649	-0.173323	RP-S18, MRPS18, rpsR; small subunit ribosomal protein S18	Ribosome [PATH:ko03010]|Ribosome [BR:ko03011]
K02601	0.0225441	-0.166506	nusG; transcriptional antiterminator NusG	Transcription machinery [BR:ko03021]|Ribosome biogenesis [BR:ko03009]
K02926	0.0423023	-0.164833	RP-L4, MRPL4, rplD; large subunit ribosomal protein L4	Ribosome [PATH:ko03010]|Ribosome [BR:ko03011]
K01873	0.0297304	-0.160433	VARS, valS; valyl-tRNA synthetase [EC:6,1,1,9]	Aminoacyl-tRNA biosynthesis [PATH:ko00970]|Amino acid related enzymes [BR:ko01007]|Transfer RNA biogenesis [BR:ko03016]
K07568	0.0212636	-0.158569	queA; S-adenosylmethionine:tRNA ribosyltransferase-isomerase [EC:2,4,99,17]	Transfer RNA biogenesis [BR:ko03016]
K02996	0.0427269	-0.154808	RP-S9, MRPS9, rpsI; small subunit ribosomal protein S9	Ribosome [PATH:ko03010]|Ribosome [BR:ko03011]
K02867	0.0407822	-0.153447	RP-L11, MRPL11, rplK; large subunit ribosomal protein L11	Ribosome [PATH:ko03010]|Ribosome [BR:ko03011]
K00939	0.049976	-0.147874	adk, AK; adenylate kinase [EC:2,7,4,3]	Purine metabolism [PATH:ko00230]|Thiamine metabolism [PATH:ko00730]|Exosome [BR:ko04147]
K04567	0.0110401	-0.142882	KARS, lysS; lysyl-tRNA synthetase, class II [EC:6,1,1,6]	Aminoacyl-tRNA biosynthesis [PATH:ko00970]|Amino acid related enzymes [BR:ko01007]|Transfer RNA biogenesis [BR:ko03016]
K02357	0.026498	-0.133879	tsf, TSFM; elongation factor Ts	Translation factors [BR:ko03012]|Mitochondrial biogenesis [BR:ko03029]
K03624	0.0336289	-0.132341	greA; transcription elongation factor GreA	Transcription machinery [BR:ko03021]
K06158	0.0464194	-0.0909982	ABCF3; ATP-binding cassette, subfamily F, member 3	Translation factors [BR:ko03012]
K01952	0.0335351	0.117783	purL, PFAS; phosphoribosylformylglycinamidine synthase [EC:6,3,5,3]	Purine metabolism [PATH:ko00230]
K00656	0.0469855	0.134531	E2,3,1,54, pflD; formate C-acetyltransferase [EC:2,3,1,54]	Pyruvate metabolism [PATH:ko00620]|Propanoate metabolism [PATH:ko00640]|Butanoate metabolism [PATH:ko00650]
K07030	0.0423008	0.135434	K07030; uncharacterized protein	Function unknown
K00850	0.0324035	0.138533	pfkA, PFK; 6-phosphofructokinase 1 [EC:2,7,1,11]	Glycolysis / Gluconeogenesis [PATH:ko00010]|Pentose phosphate pathway [PATH:ko00030]|Fructose and mannose metabolism [PATH:ko00051]|Galactose metabolism [PATH:ko00052]|Methane metabolism [PATH:ko00680]|RNA degradation [PATH:ko03018]|AMPK signaling pathway [PATH:ko04152]|Central carbon metabolism in cancer [PATH:ko05230]|Protein phosphatases and associated proteins [BR:ko01009]|Messenger RNA bioge…
K02099	0.0310359	0.160749	araC; AraC family transcriptional regulator, arabinose operon regulatory protein	Transcription factors [BR:ko03000]
K03548	0.0230062	0.16469	perM; putative permease	Transporters [BR:ko02000]
K15580	0.0277464	0.166448	oppA, mppA; oligopeptide transport system substrate-binding protein	ABC transporters [PATH:ko02010]|Quorum sensing [PATH:ko02024]|beta-Lactam resistance [PATH:ko01501]|Transporters [BR:ko02000]
K14652	0.0478777	0.169586	ribBA; 3,4-dihydroxy 2-butanone 4-phosphate synthase / GTP cyclohydrolase II [EC:4,1,99,12 3,5,4,25]	Riboflavin metabolism [PATH:ko00740]|Folate biosynthesis [PATH:ko00790]
K00527	0.0437152	0.172195	rtpR; ribonucleoside-triphosphate reductase (thioredoxin) [EC:1,17,4,2]	Purine metabolism [PATH:ko00230]|Pyrimidine metabolism [PATH:ko00240]
K02016	0.0324564	0.173174	ABC,FEV,S; iron complex transport system substrate-binding protein	ABC transporters [PATH:ko02010]|Transporters [BR:ko02000]
K03308	0.0420846	0.175043	TC,NSS; neurotransmitter:Na+ symporter, NSS family	Transport
K15773	0.0359774	0.18045	hipB; HTH-type transcriptional regulator / antitoxin HipB	Transcription factors [BR:ko03000]|Prokaryotic defense system [BR:ko02048]
K05838	0.0269513	0.187416	ybbN; putative thioredoxin	Chaperones and folding catalysts [BR:ko03110]
K00763	0.00671066	0.189128	pncB, NAPRT1; nicotinate phosphoribosyltransferase [EC:6,3,4,21]	Nicotinate and nicotinamide metabolism [PATH:ko00760]
K03789	0.0497489	0.192207	rimI; [ribosomal protein S18]-alanine N-acetyltransferase [EC:2,3,1,266]	Ribosome biogenesis [BR:ko03009]
K01938	0.00599557	0.19928	fhs; formate--tetrahydrofolate ligase [EC:6,3,4,3]	Carbon fixation pathways in prokaryotes [PATH:ko00720]|One carbon pool by folate [PATH:ko00670]
K01835	0.0463463	0.200099	pgm; phosphoglucomutase [EC:5,4,2,2]	Glycolysis / Gluconeogenesis [PATH:ko00010]|Pentose phosphate pathway [PATH:ko00030]|Galactose metabolism [PATH:ko00052]|Starch and sucrose metabolism [PATH:ko00500]|Amino sugar and nucleotide sugar metabolism [PATH:ko00520]|Purine metabolism [PATH:ko00230]|Streptomycin biosynthesis [PATH:ko00521]
K04088	0.00324297	0.209628	hflK; membrane protease subunit HflK [EC:3,4,-,-]	Enzymes with EC numbers
K02565	0.0270278	0.216097	nagC; N-acetylglucosamine repressor	Transcription factors [BR:ko03000]
K08483	0.0089452	0.219015	PTS-EI,PTSI, ptsI; phosphotransferase system, enzyme I, PtsI [EC:2,7,3,9]	Phosphotransferase system (PTS) [PATH:ko02060]|Transporters [BR:ko02000]
K00626	0.0216404	0.219758	E2,3,1,9, atoB; acetyl-CoA C-acetyltransferase [EC:2,3,1,9]	Pyruvate metabolism [PATH:ko00620]|Glyoxylate and dicarboxylate metabolism [PATH:ko00630]|Propanoate metabolism [PATH:ko00640]|Butanoate metabolism [PATH:ko00650]|Carbon fixation pathways in prokaryotes [PATH:ko00720]|Fatty acid degradation [PATH:ko00071]|Synthesis and degradation of ketone bodies [PATH:ko00072]|Valine, leucine and isoleucine degradation [PATH:ko00280]|Lysine degradation [PATH:ko…
K01190	0.0166742	0.229204	lacZ; beta-galactosidase [EC:3,2,1,23]	Galactose metabolism [PATH:ko00052]|Sphingolipid metabolism [PATH:ko00600]|Other glycan degradation [PATH:ko00511]
K12585	0.0405837	0.230358	DIS3, RRP44; exosome complex exonuclease DIS3/RRP44 [EC:3,1,13,-]	RNA degradation [PATH:ko03018]|Messenger RNA biogenesis [BR:ko03019]
K04072	0.0118309	0.240649	adhE; acetaldehyde dehydrogenase / alcohol dehydrogenase [EC:1,2,1,10 1,1,1,1]	Glycolysis / Gluconeogenesis [PATH:ko00010]|Pyruvate metabolism [PATH:ko00620]|Butanoate metabolism [PATH:ko00650]|Fatty acid degradation [PATH:ko00071]|Tyrosine metabolism [PATH:ko00350]|Chloroalkane and chloroalkene degradation [PATH:ko00625]|Naphthalene degradation [PATH:ko00626]
K02056	0.0382484	0.245932	ABC,SS,A; simple sugar transport system ATP-binding protein [EC:3,6,3,17]	Transporters [BR:ko02000]
K12264	0.0165564	0.246952	norV; anaerobic nitric oxide reductase flavorubredoxin	Salmonella infection [PATH:ko05132]
K02057	0.0117577	0.251882	ABC,SS,P; simple sugar transport system permease protein	Transporters [BR:ko02000]
K06147	0.0269616	0.253525	ABCB-BAC; ATP-binding cassette, subfamily B, bacterial	Transporters [BR:ko02000]
K00219	0.00711865	0.256351	fadH; 2,4-dienoyl-CoA reductase (NADPH2) [EC:1,3,1,34]	Enzymes with EC numbers
K00074	0.00550648	0.25776	paaH, hbd, fadB, mmgB; 3-hydroxybutyryl-CoA dehydrogenase [EC:1,1,1,157]	Butanoate metabolism [PATH:ko00650]|Phenylalanine metabolism [PATH:ko00360]|Benzoate degradation [PATH:ko00362]
K10947	0.041767	0.261891	padR; PadR family transcriptional regulator, regulatory protein PadR	Transcription factors [BR:ko03000]
K13643	0.0316367	0.268797	iscR; Rrf2 family transcriptional regulator, iron-sulfur cluster assembly transcription factor	Transcription factors [BR:ko03000]
K03310	0.00084086	0.269292	TC,AGCS; alanine or glycine:cation symporter, AGCS family	Transport
K17213	0.0451353	0.274028	K17213; inositol transport system substrate-binding protein	ABC transporters [PATH:ko02010]|Transporters [BR:ko02000]
K04761	0.0101474	0.275383	oxyR; LysR family transcriptional regulator, hydrogen peroxide-inducible genes activator	Biofilm formation - Escherichia coli [PATH:ko02026]|Transcription factors [BR:ko03000]
K03688	0.0122882	0.275935	ubiB, aarF; ubiquinone biosynthesis protein	Cofactor metabolism
K06400	3.82384e-06	0.276101	spoIVCA; site-specific DNA recombinase	Cell growth
K01681	0.0468956	0.277654	ACO, acnA; aconitate hydratase [EC:4,2,1,3]	Citrate cycle (TCA cycle) [PATH:ko00020]|Glyoxylate and dicarboxylate metabolism [PATH:ko00630]|Carbon fixation pathways in prokaryotes [PATH:ko00720]
K01126	0.0109476	0.287741	E3,1,4,46, glpQ, ugpQ; glycerophosphoryl diester phosphodiesterase [EC:3,1,4,46]	Glycerophospholipid metabolism [PATH:ko00564]
K11473	0.01087	0.289008	glcF; glycolate oxidase iron-sulfur subunit	Glyoxylate and dicarboxylate metabolism [PATH:ko00630]
K00077	0.0239505	0.289025	panE, apbA; 2-dehydropantoate 2-reductase [EC:1,1,1,169]	Pantothenate and CoA biosynthesis [PATH:ko00770]
K01487	0.0425828	0.289456	E3,5,4,3, guaD; guanine deaminase [EC:3,5,4,3]	Purine metabolism [PATH:ko00230]
K01804	0.0341658	0.292155	araA; L-arabinose isomerase [EC:5,3,1,4]	Pentose and glucuronate interconversions [PATH:ko00040]
K07646	0.0274762	0.294198	kdpD; two-component system, OmpR family, sensor histidine kinase KdpD [EC:2,7,13,3]	Two-component system [PATH:ko02020]|Protein kinases [BR:ko01001]|Two-component system [BR:ko02022]
K03925	0.041167	0.295826	mraZ; MraZ protein	General function prediction only
K07335	0.00256578	0.296181	bmpA, bmpB, tmpC; basic membrane protein A and related proteins	Cell motility
K16787	0.0164389	0.297949	ecfA2; energy-coupling factor transport system ATP-binding protein [EC:3,6,3,-]	ABC transporters [PATH:ko02010]|Transporters [BR:ko02000]
K10117	0.0118434	0.298224	msmE; raffinose/stachyose/melibiose transport system substrate-binding protein	ABC transporters [PATH:ko02010]|Transporters [BR:ko02000]
K01715	0.00139716	0.299566	crt; enoyl-CoA hydratase [EC:4,2,1,17]	Butanoate metabolism [PATH:ko00650]
K05606	0.0352483	0.301181	MCEE, epi; methylmalonyl-CoA/ethylmalonyl-CoA epimerase [EC:5,1,99,1]	Glyoxylate and dicarboxylate metabolism [PATH:ko00630]|Propanoate metabolism [PATH:ko00640]|Carbon fixation pathways in prokaryotes [PATH:ko00720]|Valine, leucine and isoleucine degradation [PATH:ko00280]
K05349	0.00705197	0.301363	bglX; beta-glucosidase [EC:3,2,1,21]	Starch and sucrose metabolism [PATH:ko00500]|Cyanoamino acid metabolism [PATH:ko00460]|Phenylpropanoid biosynthesis [PATH:ko00940]
K11068	0.00911559	0.303968	hlyIII; hemolysin III	Bacterial toxins [BR:ko02042]
K10541	0.043141	0.304403	mglC; methyl-galactoside transport system permease protein	ABC transporters [PATH:ko02010]|Transporters [BR:ko02000]
K01442	0.00783914	0.308991	E3,5,1,24; choloylglycine hydrolase [EC:3,5,1,24]	Primary bile acid biosynthesis [PATH:ko00120]|Secondary bile acid biosynthesis [PATH:ko00121]
K10439	0.00090102	0.314573	rbsB; ribose transport system substrate-binding protein	ABC transporters [PATH:ko02010]|Bacterial chemotaxis [PATH:ko02030]|Transporters [BR:ko02000]
K06442	0.00322087	0.31503	tlyA; 23S rRNA (cytidine1920-2'-O)/16S rRNA (cytidine1409-2'-O)-methyltransferase [EC:2,1,1,226 2,1,1,227]	Ribosome biogenesis [BR:ko03009]
K10118	0.0319618	0.319059	msmF; raffinose/stachyose/melibiose transport system permease protein	ABC transporters [PATH:ko02010]|Transporters [BR:ko02000]
K02484	0.00796004	0.32207	K02484; two-component system, OmpR family, sensor kinase [EC:2,7,13,3]	Protein kinases [BR:ko01001]|Two-component system [BR:ko02022]
K01677	0.0362897	0.325143	E4,2,1,2AA, fumA; fumarate hydratase subunit alpha [EC:4,2,1,2]	Citrate cycle (TCA cycle) [PATH:ko00020]|Pyruvate metabolism [PATH:ko00620]|Carbon fixation pathways in prokaryotes [PATH:ko00720]
K00286	0.00206373	0.327537	proC; pyrroline-5-carboxylate reductase [EC:1,5,1,2]	Arginine and proline metabolism [PATH:ko00330]
K15923	0.0492075	0.327765	AXY8, FUC95A, afcA; alpha-L-fucosidase 2 [EC:3,2,1,51]	Other glycan degradation [PATH:ko00511]
K17215	0.0131539	0.328314	K17215; inositol transport system ATP-binding protein	ABC transporters [PATH:ko02010]|Transporters [BR:ko02000]
K01958	0.000760759	0.328761	PC, pyc; pyruvate carboxylase [EC:6,4,1,1]	Citrate cycle (TCA cycle) [PATH:ko00020]|Pyruvate metabolism [PATH:ko00620]|Carbon fixation pathways in prokaryotes [PATH:ko00720]
K07491	0.029809	0.330051	K07491; putative transposase	Replication and repair
K07496	0.0284865	0.331709	K07496; putative transposase	Replication and repair
K00854	0.02009	0.331885	xylB, XYLB; xylulokinase [EC:2,7,1,17]	Pentose and glucuronate interconversions [PATH:ko00040]
K00974	0.0464762	0.3329	cca; tRNA nucleotidyltransferase (CCA-adding enzyme) [EC:2,7,7,72 3,1,3,- 3,1,4,-]	RNA transport [PATH:ko03013]|Transfer RNA biogenesis [BR:ko03016]
K05816	0.000503238	0.33392	ugpC; sn-glycerol 3-phosphate transport system ATP-binding protein [EC:3,6,3,20]	ABC transporters [PATH:ko02010]|Transporters [BR:ko02000]
K01533	0.0327982	0.335937	NA	NA
K00259	0.0315818	0.33917	ald; alanine dehydrogenase [EC:1,4,1,1]	Alanine, aspartate and glutamate metabolism [PATH:ko00250]|Taurine and hypotaurine metabolism [PATH:ko00430]
K00821	0.0066708	0.343599	argD; acetylornithine/N-succinyldiaminopimelate aminotransferase [EC:2,6,1,11 2,6,1,17]	Lysine biosynthesis [PATH:ko00300]|Arginine biosynthesis [PATH:ko00220]|Amino acid related enzymes [BR:ko01007]
K00031	0.0272229	0.343918	IDH1, IDH2, icd; isocitrate dehydrogenase [EC:1,1,1,42]	Citrate cycle (TCA cycle) [PATH:ko00020]|Carbon fixation pathways in prokaryotes [PATH:ko00720]|Glutathione metabolism [PATH:ko00480]|Peroxisome [PATH:ko04146]
K17686	0.0124467	0.346214	copA, ATP7; Cu+-exporting ATPase [EC:3,6,3,54]	MAPK signaling pathway - plant [PATH:ko04016]|Platinum drug resistance [PATH:ko01524]
K17837	0.0377174	0.346235	bla2, blm, ccrA, blaB; metallo-beta-lactamase class B [EC:3,5,2,6]	beta-Lactam resistance [PATH:ko01501]
K10119	0.005435	0.347785	msmG; raffinose/stachyose/melibiose transport system permease protein	ABC transporters [PATH:ko02010]|Transporters [BR:ko02000]
K13479	0.0303669	0.349154	ygeT, xdhB; xanthine dehydrogenase FAD-binding subunit [EC:1,17,1,4]	Purine metabolism [PATH:ko00230]
K07141	0.0268063	0.351364	mocA; molybdenum cofactor cytidylyltransferase [EC:2,7,7,76]	Folate biosynthesis [PATH:ko00790]
K01048	0.00620829	0.357313	pldB; lysophospholipase [EC:3,1,1,5]	Glycerophospholipid metabolism [PATH:ko00564]
K00563	0.0382553	0.362382	rlmA1; 23S rRNA (guanine745-N1)-methyltransferase [EC:2,1,1,187]	Ribosome biogenesis [BR:ko03009]
K03885	0.0101647	0.363658	ndh; NADH dehydrogenase [EC:1,6,99,3]	Oxidative phosphorylation [PATH:ko00190]
K00036	0.0411244	0.365273	G6PD, zwf; glucose-6-phosphate 1-dehydrogenase [EC:1,1,1,49 1,1,1,363]	Pentose phosphate pathway [PATH:ko00030]|Glutathione metabolism [PATH:ko00480]|Central carbon metabolism in cancer [PATH:ko05230]|Exosome [BR:ko04147]
K14659	0.0377301	0.365344	nodB; chitooligosaccharide deacetylase [EC:3,5,1,-]	Enzymes with EC numbers
K02204	0.0188675	0.365842	thrB2; homoserine kinase type II [EC:2,7,1,39]	Glycine, serine and threonine metabolism [PATH:ko00260]
K07402	0.0164451	0.366798	xdhC; xanthine dehydrogenase accessory factor	Protein processing
K12547	0.0476333	0.36763	plyA; polysaccharidase protein	Glycan metabolism
K12528	0.0413394	0.367989	xdhD; putative selenate reductase molybdopterin-binding subunit	Selenocompound metabolism [PATH:ko00450]
K15023	0.0369116	0.37025	acsE; 5-methyltetrahydrofolate corrinoid/iron sulfur protein methyltransferase [EC:2,1,1,258]	Carbon fixation pathways in prokaryotes [PATH:ko00720]
K17319	0.0397086	0.371029	lplB; putative aldouronate transport system permease protein	ABC transporters [PATH:ko02010]|Transporters [BR:ko02000]
K00853	0.0170856	0.371236	araB; L-ribulokinase [EC:2,7,1,16]	Pentose and glucuronate interconversions [PATH:ko00040]
K00244	0.0314186	0.371555	frdA; fumarate reductase flavoprotein subunit [EC:1,3,5,4]	Citrate cycle (TCA cycle) [PATH:ko00020]|Pyruvate metabolism [PATH:ko00620]|Butanoate metabolism [PATH:ko00650]|Oxidative phosphorylation [PATH:ko00190]|Carbon fixation pathways in prokaryotes [PATH:ko00720]|Two-component system [PATH:ko02020]
K05882	0.0133582	0.374968	E1,1,1,91; aryl-alcohol dehydrogenase (NADP+) [EC:1,1,1,91]	Enzymes with EC numbers
K01965	0.0133162	0.375206	PCCA, pccA; propionyl-CoA carboxylase alpha chain [EC:6,4,1,3]	Glyoxylate and dicarboxylate metabolism [PATH:ko00630]|Propanoate metabolism [PATH:ko00640]|Valine, leucine and isoleucine degradation [PATH:ko00280]
K04759	0.0246634	0.38246	feoB; ferrous iron transport protein B	Transporters [BR:ko02000]
K02587	0.0426508	0.383023	nifE; nitrogenase molybdenum-cofactor synthesis protein NifE	Energy metabolism
K01689	0.00138034	0.384093	ENO, eno; enolase [EC:4,2,1,11]	Glycolysis / Gluconeogenesis [PATH:ko00010]|Methane metabolism [PATH:ko00680]|RNA degradation [PATH:ko03018]|HIF-1 signaling pathway [PATH:ko04066]|Messenger RNA biogenesis [BR:ko03019]|Exosome [BR:ko04147]
K09681	0.0396645	0.387036	gltC; LysR family transcriptional regulator, transcription activator of glutamate synthase operon	Transcription factors [BR:ko03000]
K03639	0.0496901	0.388605	moaA, CNX2; GTP 3',8-cyclase [EC:4,1,99,22]	Folate biosynthesis [PATH:ko00790]|Sulfur relay system [PATH:ko04122]
K03299	0.0400023	0.389733	TC,GNTP; gluconate:H+ symporter, GntP family	Transporters [BR:ko02000]
K02172	0.0160202	0.390124	blaR1; bla regulator protein blaR1	beta-Lactam resistance [PATH:ko01501]|Peptidases [BR:ko01002]|Antimicrobial resistance genes [BR:ko01504]
K03338	0.0237202	0.392903	iolC; 5-dehydro-2-deoxygluconokinase [EC:2,7,1,92]	Inositol phosphate metabolism [PATH:ko00562]
K03831	0.0141985	0.392958	mogA; molybdopterin adenylyltransferase [EC:2,7,7,75]	Folate biosynthesis [PATH:ko00790]|Sulfur relay system [PATH:ko04122]
K14260	0.0402181	0.39417	alaA; alanine-synthesizing transaminase [EC:2,6,1,66 2,6,1,2]	Alanine, aspartate and glutamate metabolism [PATH:ko00250]|Valine, leucine and isoleucine biosynthesis [PATH:ko00290]|Arginine biosynthesis [PATH:ko00220]|Amino acid related enzymes [BR:ko01007]
K00937	0.0141879	0.396505	ppk; polyphosphate kinase [EC:2,7,4,1]	Oxidative phosphorylation [PATH:ko00190]|RNA degradation [PATH:ko03018]|Messenger RNA biogenesis [BR:ko03019]
K07576	0.00183438	0.399517	K07576; metallo-beta-lactamase family protein	Translation
K00113	0.020261	0.399557	glpC; glycerol-3-phosphate dehydrogenase subunit C [EC:1,1,5,3]	Glycerophospholipid metabolism [PATH:ko00564]
K10200	0.00790705	0.399883	ABC,NGC,S; N-acetylglucosamine transport system substrate-binding protein	ABC transporters [PATH:ko02010]|Transporters [BR:ko02000]
K10709	0.0490772	0.400218	frlC; fructoselysine 3-epimerase [EC:5,1,3,41]	Enzymes with EC numbers
K07469	0.0230267	0.404847	mop; aldehyde oxidoreductase [EC:1,2,99,7]	Enzymes with EC numbers
K03205	0.0106516	0.405746	virD4, lvhD4; type IV secretion system protein VirD4	Bacterial secretion system [PATH:ko03070]|Secretion system [BR:ko02044]
K05989	0.00249213	0.407421	ramA; alpha-L-rhamnosidase [EC:3,2,1,40]	Enzymes with EC numbers
K03389	0.047131	0.409025	hdrB2; heterodisulfide reductase subunit B2 [EC:1,8,7,3 1,8,98,4 1,8,98,5 1,8,98,6]	Methane metabolism [PATH:ko00680]
K17318	0.0132918	0.410534	K17318, lplA; putative aldouronate transport system substrate-binding protein	ABC transporters [PATH:ko02010]|Transporters [BR:ko02000]
K03709	0.0128864	0.410716	troR; DtxR family transcriptional regulator, Mn-dependent transcriptional regulator	Transcription factors [BR:ko03000]
K03303	0.00493924	0.412365	lctP; lactate permease	Transporters [BR:ko02000]
K10189	0.0106941	0.412771	lacF, araP; lactose/L-arabinose transport system permease protein	ABC transporters [PATH:ko02010]|Transporters [BR:ko02000]
K04517	0.0160328	0.413214	tyrA2; prephenate dehydrogenase [EC:1,3,1,12]	Phenylalanine, tyrosine and tryptophan biosynthesis [PATH:ko00400]|Novobiocin biosynthesis [PATH:ko00401]
K00616	0.0154616	0.414097	E2,2,1,2, talA, talB; transaldolase [EC:2,2,1,2]	Pentose phosphate pathway [PATH:ko00030]
K00666	0.0101366	0.414621	ACSF2; fatty-acyl-CoA synthase [EC:6,2,1,-]	Lipid biosynthesis proteins [BR:ko01004]
K00965	0.00233231	0.414649	galT, GALT; UDPglucose--hexose-1-phosphate uridylyltransferase [EC:2,7,7,12]	Galactose metabolism [PATH:ko00052]|Amino sugar and nucleotide sugar metabolism [PATH:ko00520]|Prolactin signaling pathway [PATH:ko04917]
K14138	0.0294634	0.414797	acsB; acetyl-CoA synthase [EC:2,3,1,169]	Carbon fixation pathways in prokaryotes [PATH:ko00720]
K09809	0.014878	0.421335	tagF; CDP-glycerol glycerophosphotransferase [EC:2,7,8,12]	Enzymes with EC numbers
K11645	0.00950536	0.421818	fbaB; fructose-bisphosphate aldolase, class I [EC:4,1,2,13]	Glycolysis / Gluconeogenesis [PATH:ko00010]|Pentose phosphate pathway [PATH:ko00030]|Fructose and mannose metabolism [PATH:ko00051]|Carbon fixation in photosynthetic organisms [PATH:ko00710]|Methane metabolism [PATH:ko00680]
K11261	0.0317078	0.423178	fwdE, fmdE; formylmethanofuran dehydrogenase subunit E [EC:1,2,7,12]	Methane metabolism [PATH:ko00680]
K10563	0.0324584	0.423448	mutM, fpg; formamidopyrimidine-DNA glycosylase [EC:3,2,2,23 4,2,99,18]	Base excision repair [PATH:ko03410]|DNA repair and recombination proteins [BR:ko03400]
K07699	0.0446448	0.426808	spo0A; two-component system, response regulator, stage 0 sporulation protein A	Two-component system [PATH:ko02020]|Quorum sensing [PATH:ko02024]|Two-component system [BR:ko02022]
K01057	0.0298958	0.432211	PGLS, pgl, devB; 6-phosphogluconolactonase [EC:3,1,1,31]	Pentose phosphate pathway [PATH:ko00030]
K01659	0.000885274	0.433103	prpC; 2-methylcitrate synthase [EC:2,3,3,5]	Propanoate metabolism [PATH:ko00640]
K00198	0.0166922	0.435788	cooS, acsA; anaerobic carbon-monoxide dehydrogenase catalytic subunit [EC:1,2,7,4]	Carbon fixation pathways in prokaryotes [PATH:ko00720]|Methane metabolism [PATH:ko00680]|Nitrotoluene degradation [PATH:ko00633]
K13069	0.0356094	0.438218	E2,7,7,65; diguanylate cyclase [EC:2,7,7,65]	Enzymes with EC numbers
K07015	0.0134254	0.441299	K07015; uncharacterized protein	Function unknown
K10202	0.00329775	0.442711	ABC,NGC,P1; N-acetylglucosamine transport system permease protein	ABC transporters [PATH:ko02010]|Transporters [BR:ko02000]
K01451	0.0107968	0.448524	hipO; hippurate hydrolase [EC:3,5,1,32]	Phenylalanine metabolism [PATH:ko00360]|Peptidases [BR:ko01002]
K03475	0.0261567	0.458447	PTS-Ula-EIIC, ulaA, sgaT; PTS system, ascorbate-specific IIC component	Ascorbate and aldarate metabolism [PATH:ko00053]|Phosphotransferase system (PTS) [PATH:ko02060]|Transporters [BR:ko02000]
K17472	0.037268	0.458815	cymR; Rrf2 family transcriptional regulator, cysteine metabolism repressor	Transcription factors [BR:ko03000]
K09690	0.0280669	0.467073	ABC-2,LPSE,P; lipopolysaccharide transport system permease protein	ABC transporters [PATH:ko02010]|Transporters [BR:ko02000]
K00975	0.000129685	0.467561	glgC; glucose-1-phosphate adenylyltransferase [EC:2,7,7,27]	Starch and sucrose metabolism [PATH:ko00500]|Amino sugar and nucleotide sugar metabolism [PATH:ko00520]|Biofilm formation - Escherichia coli [PATH:ko02026]
K00125	0.0154773	0.469074	fdhB; formate dehydrogenase (coenzyme F420) beta subunit [EC:1,17,98,3 1,8,98,6]	Methane metabolism [PATH:ko00680]
K03077	0.0260252	0.473158	araD, ulaF, sgaE, sgbE; L-ribulose-5-phosphate 4-epimerase [EC:5,1,3,4]	Pentose and glucuronate interconversions [PATH:ko00040]|Ascorbate and aldarate metabolism [PATH:ko00053]
K01453	0.0115362	0.474571	nylB; 6-aminohexanoate-oligomer exohydrolase [EC:3,5,1,46]	Caprolactam degradation [PATH:ko00930]
K12243	0.0233539	0.474706	pchR; AraC family transcriptional regulator, transcriptional activator of the genes for pyochelin and ferripyochelin receptors	Transcription factors [BR:ko03000]
K00060	0.0113054	0.476654	tdh; threonine 3-dehydrogenase [EC:1,1,1,103]	Glycine, serine and threonine metabolism [PATH:ko00260]
K03326	0.0485118	0.477008	TC,DCUC, dcuC, dcuD; C4-dicarboxylate transporter, DcuC family	Transporters [BR:ko02000]
K02746	0.0422028	0.478145	PTS-Aga-EIIC, agaW; PTS system, N-acetylgalactosamine-specific IIC component	Galactose metabolism [PATH:ko00052]|Phosphotransferase system (PTS) [PATH:ko02060]|Transporters [BR:ko02000]
K04758	0.0296028	0.478677	feoA; ferrous iron transport protein A	Transporters [BR:ko02000]
K07321	0.00203802	0.478858	cooC; CO dehydrogenase maturation factor	Cell growth
K00087	0.000747653	0.484602	ygeS, xdhA; xanthine dehydrogenase molybdenum-binding subunit [EC:1,17,1,4]	Purine metabolism [PATH:ko00230]
K10559	0.0396387	0.485902	rhaS; rhamnose transport system substrate-binding protein	ABC transporters [PATH:ko02010]|Transporters [BR:ko02000]
K11894	0.00138962	0.487673	impI, vasC; type VI secretion system protein ImpI	Secretion system [BR:ko02044]
K01342	0.0153958	0.488188	aprE; subtilisin [EC:3,4,21,62]	Quorum sensing [PATH:ko02024]|Peptidases [BR:ko01002]|Chaperones and folding catalysts [BR:ko03110]
K07047	0.0188316	0.489048	nfdA; N-substituted formamide deformylase [EC:3,5,1,91]	Enzymes with EC numbers
K06223	0.00734063	0.490094	dam; DNA adenine methylase [EC:2,1,1,72]	Mismatch repair [PATH:ko03430]|DNA replication proteins [BR:ko03032]|DNA repair and recombination proteins [BR:ko03400]|Prokaryotic defense system [BR:ko02048]
K03335	0.0185025	0.491221	iolE; inosose dehydratase [EC:4,2,1,44]	Inositol phosphate metabolism [PATH:ko00562]
K00194	0.00339586	0.491582	cdhD, acsD; acetyl-CoA decarbonylase/synthase complex subunit delta [EC:2,1,1,245]	Carbon fixation pathways in prokaryotes [PATH:ko00720]|Methane metabolism [PATH:ko00680]
K06882	0.00300787	0.492669	K06882; uncharacterized protein	Function unknown
K10195	0.0248642	0.496088	togA; oligogalacturonide transport system ATP-binding protein	ABC transporters [PATH:ko02010]|Transporters [BR:ko02000]
K02747	0.0426321	0.503529	PTS-Aga-EIID, agaE; PTS system, N-acetylgalactosamine-specific IID component	Galactose metabolism [PATH:ko00052]|Phosphotransferase system (PTS) [PATH:ko02060]|Transporters [BR:ko02000]
K07216	0.013869	0.50413	K07216; hemerythrin	Others
K10188	0.000314439	0.504793	lacE, araN; lactose/L-arabinose transport system substrate-binding protein	ABC transporters [PATH:ko02010]|Transporters [BR:ko02000]
K10562	0.0330295	0.50697	rhaT; rhamnose transport system ATP-binding protein [EC:3,6,3,17]	ABC transporters [PATH:ko02010]|Transporters [BR:ko02000]
K00865	0.00701498	0.508656	glxK, garK; glycerate 2-kinase [EC:2,7,1,165]	Glyoxylate and dicarboxylate metabolism [PATH:ko00630]|Glycerolipid metabolism [PATH:ko00561]|Glycine, serine and threonine metabolism [PATH:ko00260]
K07017	0.041783	0.51264	K07017; uncharacterized protein	Function unknown
K01492	0.00775095	0.516438	purNH; phosphoribosylglycinamide/phosphoribosylaminoimidazolecarboxamide formyltransferase [EC:2,1,2,2 2,1,2,3]	Purine metabolism [PATH:ko00230]|One carbon pool by folate [PATH:ko00670]
K00613	0.0208303	0.536153	GATM; glycine amidinotransferase [EC:2,1,4,1]	Glycine, serine and threonine metabolism [PATH:ko00260]|Arginine and proline metabolism [PATH:ko00330]
K01678	0.00817058	0.537381	E4,2,1,2AB, fumB; fumarate hydratase subunit beta [EC:4,2,1,2]	Citrate cycle (TCA cycle) [PATH:ko00020]|Pyruvate metabolism [PATH:ko00620]|Carbon fixation pathways in prokaryotes [PATH:ko00720]
K11381	0.0466434	0.538261	bkdA; 2-oxoisovalerate dehydrogenase E1 component [EC:1,2,4,4]	Propanoate metabolism [PATH:ko00640]|Valine, leucine and isoleucine degradation [PATH:ko00280]
K18206	0.0182208	0.547119	hypBA2; beta-L-arabinobiosidase [EC:3,2,1,187]	Enzymes with EC numbers
K04026	0.0146393	0.548265	eutL; ethanolamine utilization protein EutL	Amino acid metabolism
K06911	0.00175379	0.555263	K06911; uncharacterized protein	Function unknown
K07793	0.0350529	0.559075	tctA; putative tricarboxylic transport membrane protein	Two-component system [PATH:ko02020]|Transporters [BR:ko02000]
K06919	0.0282625	0.562159	K06919; putative DNA primase/helicase	Replication and repair
K00041	0.0355568	0.562454	uxaB; tagaturonate reductase [EC:1,1,1,58]	Pentose and glucuronate interconversions [PATH:ko00040]
K12512	0.0153733	0.582385	tadD; tight adherence protein D	Secretion system [BR:ko02044]
K09384	0.0186921	0.585317	K09384; uncharacterized protein	Function unknown
K15855	0.0164472	0.588889	csxA; exo-1,4-beta-D-glucosaminidase [EC:3,2,1,165]	Amino sugar and nucleotide sugar metabolism [PATH:ko00520]
K17624	0.0292698	0.592764	engCP, engBF, endoEF; endo-alpha-N-acetylgalactosaminidase [EC:3,2,1,97]	Enzymes with EC numbers
K00702	0.0221554	0.604644	E2,4,1,20; cellobiose phosphorylase [EC:2,4,1,20]	Starch and sucrose metabolism [PATH:ko00500]
K00102	0.00305042	0.60535	LDHD, dld; D-lactate dehydrogenase (cytochrome) [EC:1,1,2,4]	Pyruvate metabolism [PATH:ko00620]
K00197	5.37767e-05	0.606122	cdhE, acsC; acetyl-CoA decarbonylase/synthase complex subunit gamma [EC:2,1,1,245]	Carbon fixation pathways in prokaryotes [PATH:ko00720]|Methane metabolism [PATH:ko00680]
K06350	0.0270478	0.615503	kipA; antagonist of KipI	Cell growth
K03826	0.00939675	0.62029	yiaC; putative acetyltransferase [EC:2,3,1,-]	Enzymes with EC numbers
K12997	0.0197478	0.620701	rgpB; rhamnosyltransferase [EC:2,4,1,-]	Glycosyltransferases [BR:ko01003]|Lipopolysaccharide biosynthesis proteins [BR:ko01005]
K00756	0.000237619	0.621277	pdp; pyrimidine-nucleoside phosphorylase [EC:2,4,2,2]	Pyrimidine metabolism [PATH:ko00240]
K02103	0.00346451	0.624202	araR; GntR family transcriptional regulator, arabinose operon transcriptional repressor	Transcription factors [BR:ko03000]
K17473	0.011713	0.630382	dgaR; sigma-54 dependent transcriptional regulator, dga operon transcriptional activator	Transcription factors [BR:ko03000]
K03390	0.00381888	0.640458	hdrC2; heterodisulfide reductase subunit C2 [EC:1,8,7,3 1,8,98,4 1,8,98,5 1,8,98,6]	Methane metabolism [PATH:ko00680]
K16951	0.00341607	0.64354	asrB; anaerobic sulfite reductase subunit B	Sulfur metabolism [PATH:ko00920]
K07778	0.0284583	0.649806	desK; two-component system, NarL family, sensor histidine kinase DesK [EC:2,7,13,3]	Two-component system [PATH:ko02020]|Protein kinases [BR:ko01001]|Two-component system [BR:ko02022]
K12553	0.013719	0.656734	pbp3; penicillin-binding protein 3 [EC:3,4,-,-]	Peptidoglycan biosynthesis [PATH:ko00550]|beta-Lactam resistance [PATH:ko01501]|Peptidoglycan biosynthesis and degradation proteins [BR:ko01011]
K02055	0.0385289	0.661274	ABC,SP,S; putative spermidine/putrescine transport system substrate-binding protein	Quorum sensing [PATH:ko02024]|Transporters [BR:ko02000]
K05928	0.0486858	0.662137	E2,1,1,95; tocopherol O-methyltransferase [EC:2,1,1,95]	Ubiquinone and other terpenoid-quinone biosynthesis [PATH:ko00130]
K00614	0.0126817	0.669179	CSKMT, METTL12; citrate synthase lysine N-methyltransferase [EC:2,1,1,-]	Enzymes with EC numbers
K14954	0.035466	0.691657	lprG; lipoprotein LprG	Tuberculosis [PATH:ko05152]
K05568	0.0060268	0.693009	mnhD, mrpD; multicomponent Na+:H+ antiporter subunit D	Transporters [BR:ko02000]
K10021	0.0259374	0.695867	occP, nocP; octopine/nopaline transport system ATP-binding protein [EC:7,4,2,1]	ABC transporters [PATH:ko02010]|Transporters [BR:ko02000]
K02036	0.0249855	0.715474	pstB; phosphate transport system ATP-binding protein [EC:7,3,2,1]	ABC transporters [PATH:ko02010]|Transporters [BR:ko02000]
K18298	0.0244292	0.71668	mexE; membrane fusion protein, multidrug efflux system	Transporters [BR:ko02000]|Antimicrobial resistance genes [BR:ko01504]
K05341	0.00363179	0.734769	E2,4,1,4; amylosucrase [EC:2,4,1,4]	Starch and sucrose metabolism [PATH:ko00500]
K16926	0.00302458	0.774237	htsT; energy-coupling factor transport system substrate-specific component	Transporters [BR:ko02000]
K01598	0.0167134	0.782406	PPCDC, coaC; phosphopantothenoylcysteine decarboxylase [EC:4,1,1,36]	Pantothenate and CoA biosynthesis [PATH:ko00770]
K00658	0.00636707	0.798007	DLST, sucB; 2-oxoglutarate dehydrogenase E2 component (dihydrolipoamide succinyltransferase) [EC:2,3,1,61]	Citrate cycle (TCA cycle) [PATH:ko00020]|Lysine degradation [PATH:ko00310]
K02037	0.0069828	0.810423	pstC; phosphate transport system permease protein	ABC transporters [PATH:ko02010]|Transporters [BR:ko02000]
K16200	0.031882	0.874931	dppB1; dipeptide transport system permease protein	ABC transporters [PATH:ko02010]|Transporters [BR:ko02000]
K01061	0.0225883	0.885597	E3,1,1,45; carboxymethylenebutenolidase [EC:3,1,1,45]	Fluorobenzoate degradation [PATH:ko00364]|Chlorocyclohexane and chlorobenzene degradation [PATH:ko00361]|Toluene degradation [PATH:ko00623]
K01167	0.0473013	0.916421	E3,1,27,3; ribonuclease T1 [EC:3,1,27,3]	Messenger RNA biogenesis [BR:ko03019]|Transfer RNA biogenesis [BR:ko03016]
K07694	0.0118393	0.9255	vraR; two-component system, NarL family, vancomycin resistance associated response regulator VraR	Two-component system [PATH:ko02020]|Two-component system [BR:ko02022]
K16209	0.0284779	0.955769	lacS, galP, rafP; lactose/raffinose/galactose permease	Transporters [BR:ko02000]
K10193	0.021362	0.981715	togM; oligogalacturonide transport system permease protein	ABC transporters [PATH:ko02010]|Transporters [BR:ko02000]
K05815	0.0157178	0.990413	ugpE; sn-glycerol 3-phosphate transport system permease protein	ABC transporters [PATH:ko02010]|Transporters [BR:ko02000]
K09163	0.0029442	1.01359	K09163; uncharacterized protein	Function unknown
K02043	0.0377146	1.01723	phnF; GntR family transcriptional regulator, phosphonate transport system regulatory protein	Transcription factors [BR:ko03000]
K16012	0.0349944	1.02262	cydC; ATP-binding cassette, subfamily C, bacterial CydC	ABC transporters [PATH:ko02010]|Transporters [BR:ko02000]
K14084	0.00793617	1.1174	mttC; trimethylamine corrinoid protein	Methane metabolism [PATH:ko00680]
K10194	0.00570461	1.16135	togN; oligogalacturonide transport system permease protein	ABC transporters [PATH:ko02010]|Transporters [BR:ko02000]
K01739	0.0190327	1.19715	metB; cystathionine gamma-synthase [EC:2,5,1,48]	Sulfur metabolism [PATH:ko00920]|Cysteine and methionine metabolism [PATH:ko00270]|Selenocompound metabolism [PATH:ko00450]
K02039	0.000116046	1.22913	phoU; phosphate transport system protein	Others
